# Supplementary material for: Ultrafine VN quantum dots modified with a nitrogen-doped reduced graphene oxide anode material for enhanced rate capability and lifespan of lithium-ion batteries
Source: Royal Society of Chemistry journal article supplement (doi:10.1039/d4nj00502c), 2024-01-01
Supplement: d4nj00502c1.pdf [file d4nj00502c1.pdf]

**Ultrafine VN Quantum Dots Modified with Nitrogen Doped Reduced Graphene  
Oxide Anode Material for Enhanced Rate Capability and Lifespan of Lithium-ion  
Batteries**

Dong Wang <sup>a</sup>, Zihan Guo <sup>a</sup>, Zhiwei Wang <sup>a,b</sup>, Yanfang Gao <sup>a\*</sup>

<sup>a</sup> School of Chemical Engineering, Inner Mongolia University of Technology, Hohhot, 010051, P.R. China.

<sup>b</sup> School of Business Administration, Inner Mongolia University of Finance and Economics, Hohhot, 010070, P.R. China.

Corresponding author: Yanfang Gao

E-mail addresses: yf\_gao@imut.edu.cn

## 1.Supporting figures and tables

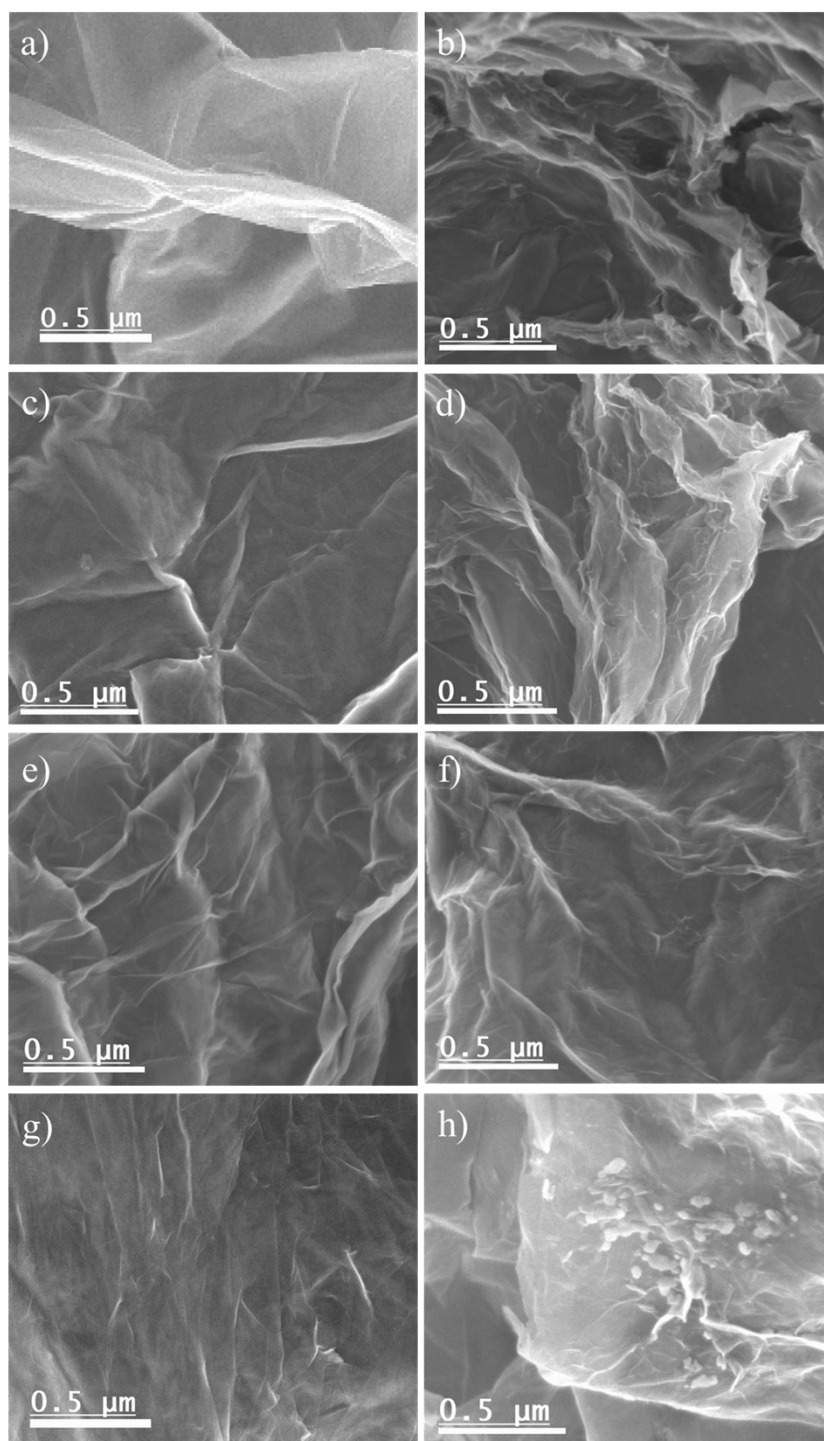

**Figure S1** SEM images of a) GO, b) NrGO, c)  $V_xO_y$ QDs@GO-1, d) VNQDs@NrGO-1, e)  $V_xO_y$ QDs@GO-5, f) VNQDs@NrGO-5, g)  $V_xO_y$ QDs@GO-10, and h) VNQDs@NrGO-10.

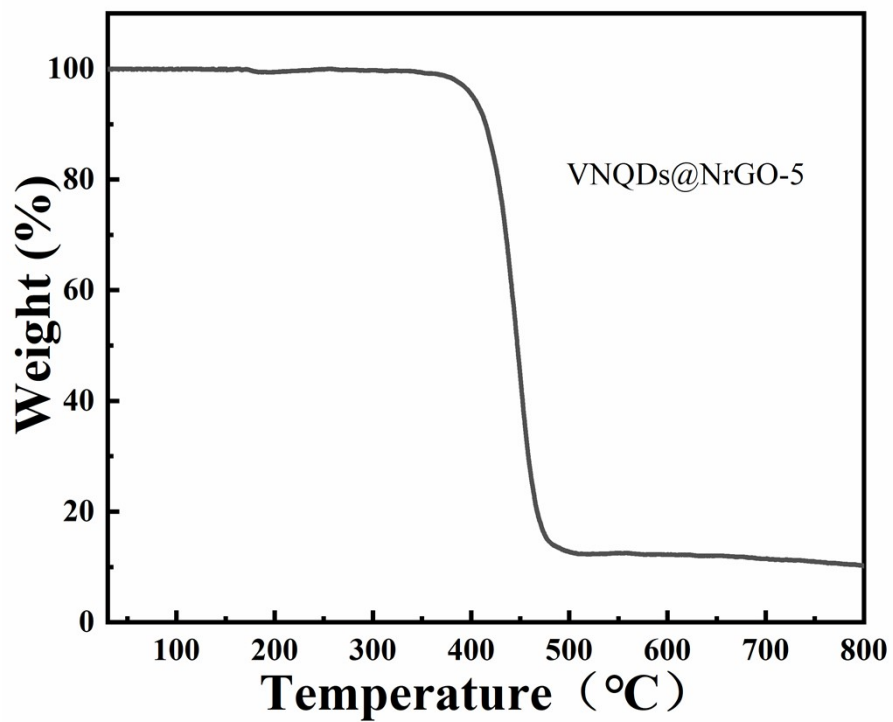

**Figure S2** TGA date of VNQDs@NrGO-5.

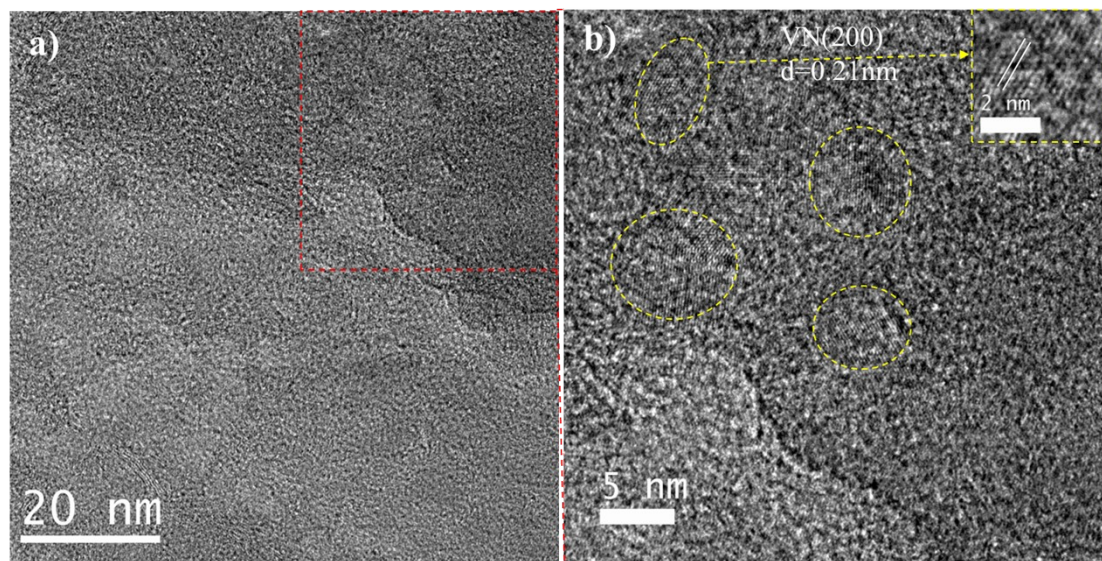

**Figure S3** a) TEM and b) HRTEM images of the discharged products on VNQDs@NrGO-5 at 2 A g<sup>-1</sup> after 500 cycles.

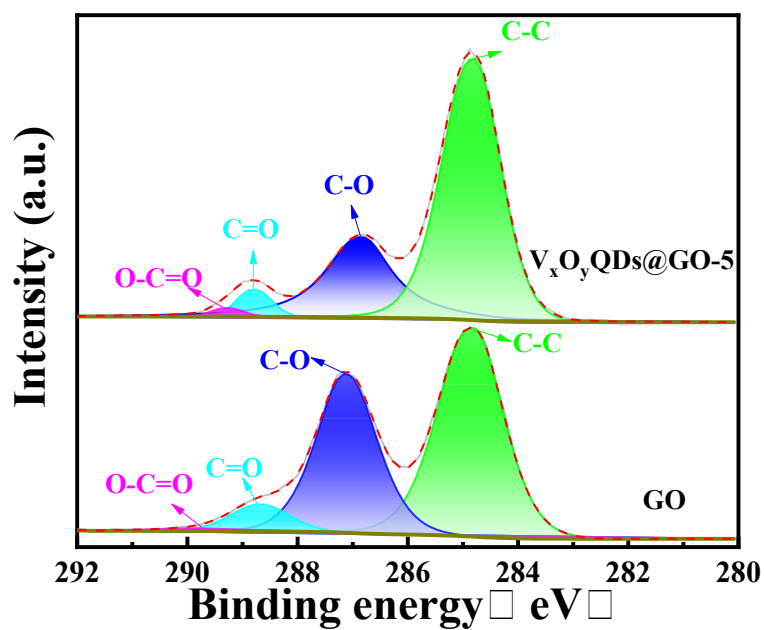

Figure S4 C 1s spectra of the GO and  $V_xO_yQDs@GO-5$ .

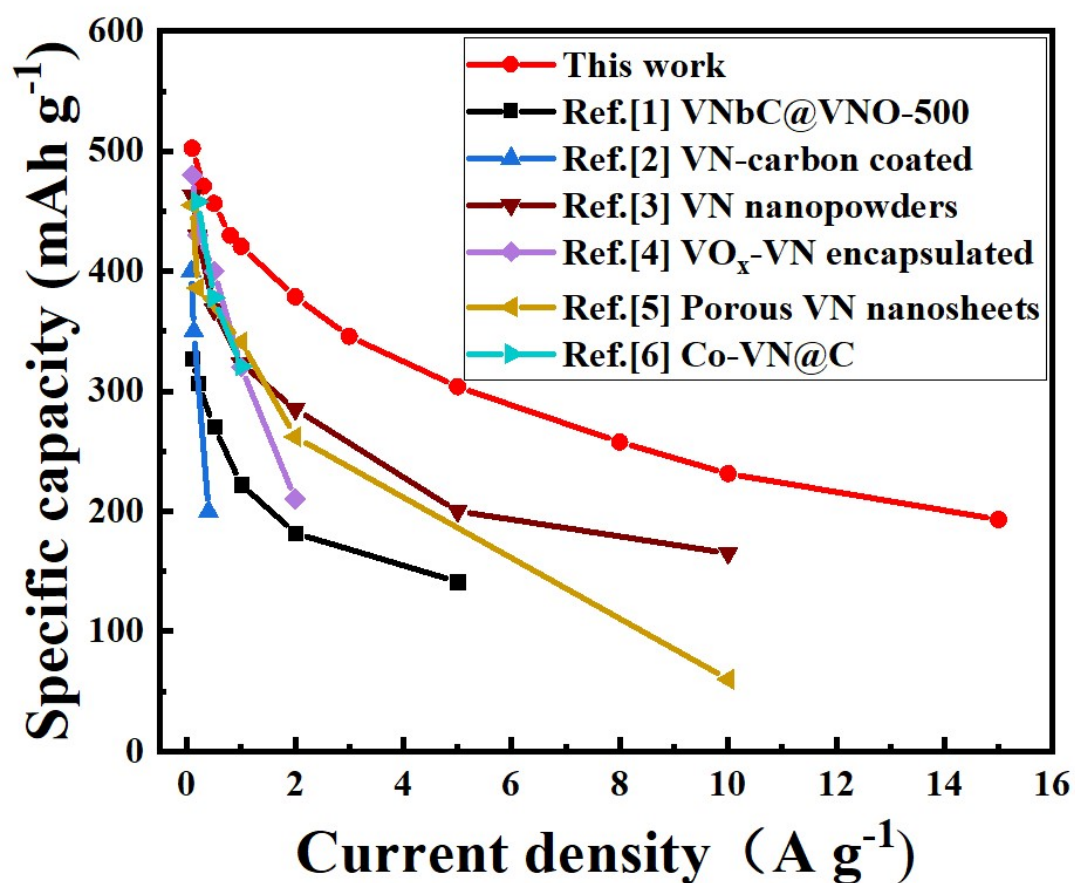

Figure S5 Rate comparison of the VNQDs@NrGO-5 and previously reported vanadium-based nitrides for LIBs.<sup>1-6</sup>

**Table S1** The d-spacing and degree of the neat GO, rGO, V<sub>x</sub>O<sub>y</sub>QDs@GO-5, and VNQDs@NrGO-5

| Samples                                 | d(Å)   | 2θ (°) | Samples       | d(Å)   | 2θ (°) |
|-----------------------------------------|--------|--------|---------------|--------|--------|
| GO                                      | 8.9948 | 9.825  | NrGO          | 3.3947 | 26.230 |
| V <sub>x</sub> O <sub>y</sub> QDs@GO-1  | 8.5262 | 10.367 | VNQDs@NrGO-1  | 3.4578 | 25.743 |
| V <sub>x</sub> O <sub>y</sub> QDs@GO-5  | 7.4080 | 11.937 | VNQDs@NrGO-5  | 3.4866 | 25.526 |
| V <sub>x</sub> O <sub>y</sub> QDs@GO-10 | 7.2124 | 12.262 | VNQDs@NrGO-10 | 3.5013 | 25.418 |

**Table S2.** The ratio of ID to IG for the investigated sheets, where ID and IG are the Raman intensities of the D and G peaks

| Samples                                | ID: IG |
|----------------------------------------|--------|
| GO                                     | 0.94   |
| V <sub>x</sub> O <sub>y</sub> QDs@GO-5 | 0.97   |
| NrGO                                   | 1.13   |
| VNQDs@NrGO-5                           | 1.16   |

**Table S3** The atom percentage of elements (C, N, O, and V) in the XPS data

| Samples                                | C (%) | O (%) | N (%) | V (%) |
|----------------------------------------|-------|-------|-------|-------|
| GO                                     | 71.74 | 28.26 |       |       |
| V <sub>x</sub> O <sub>y</sub> QDs@GO-5 | 73.13 | 20.37 |       | 6.49  |
| NrGO                                   | 84.36 | 13.10 | 2.53  |       |
| VNQDs@NrGO-5                           | 80.96 | 10.02 | 5.62  | 3.41  |

**Table S4** The atom percentage of C-C, C-O, C=C, and C=O according to the C 1s and the percentage of V-O/V-N according to the V 2p peak in the obtained XPS spectra

| Samples                                | C-C (%) | C-N (%) | C-O (%) | C=O (%) | O-C=O (%) | V-O (%) | V-O-N (%) | V-N (%) |
|----------------------------------------|---------|---------|---------|---------|-----------|---------|-----------|---------|
| GO                                     | 54.31   |         | 38.51   | 6.24    | 0.94      |         |           |         |
| V <sub>x</sub> O <sub>y</sub> QDs@GO-5 | 68.93   |         | 23.00   | 4.29    | 3.78      | 100     |           |         |
| NrGO                                   | 52.82   | 25.55   | 15.86   | 2.82    | 2.95      |         |           |         |
| VNQDs@NrGO-5                           | 45.74   | 32.95   | 9.33    | 2.92    | 9.06      | 39.72   | 30.37     | 29.89   |

**Table S5** Resistance elements of four samples derived from the Nyquist plots.

| Samples       | R <sub>s</sub> (Ω) | R <sub>ct</sub> (Ω) | W <sub>o</sub> (Ω) |
|---------------|--------------------|---------------------|--------------------|
| NrGO          | 1.649              | 215.8               | 228.4              |
| VNQDs@NrGO-1  | 2.184              | 206.1               | 220.7              |
| VNQDs@NrGO-5  | 1.236              | 81.84               | 72.62              |
| VNQDs@NrGO-10 | 2.056              | 136.7               | 155.5              |

**Table S6 Comparison of the electrochemical performance of VNQDs@NrGO-5 and various metal nitride electrodes in LIB applications.**

| Samples                          | Whether to use dangerous ammonia atmosphere | Current density (A g <sup>-1</sup> ) | Cycling number | Specific capacity (mAh g <sup>-1</sup> ) | Ref.      |
|----------------------------------|---------------------------------------------|--------------------------------------|----------------|------------------------------------------|-----------|
| VNbC@VNO-500                     | No                                          | 0.1<br>5                             | 100<br>1000    | 400<br>324                               | 1         |
| VN-carbon coated                 | No                                          | 0.065                                | 100            | 400                                      | 2         |
| VN nanopowders                   | Yes                                         | 0.1                                  | 250            | 634                                      | 3         |
| VO <sub>x</sub> -VN encapsulated | No                                          | 0.5<br>2                             | 200<br>/       | 380<br>220                               | 4         |
| Porous VN nanosheets             | Yes                                         | 0.1<br>1                             | 200<br>250     | 455<br>341                               | 5         |
| Co-VN@C                          | Yes                                         | 0.5<br>1                             | 500<br>200     | 336<br>324                               | 6         |
| VNQD@NrGO-5                      | No                                          | 0.1<br>2                             | 10<br>10000    | 492<br>324                               | This work |

## REFERENCES

1. C. Xu, K. Feng, X. Yang, Y. Cheng, X. Zhao, L. Yang and S. Yin, *Journal of Energy Storage*, 2023, **69**, 107888.
2. D. Kundu, F. Krumeich, R. Fotedar and R. Nesper, *J. Power Sources*, 2015, **278**, 608–613.
3. M. Qin, H. Wu, Z. Cao, D. Zhang, B. Jia and X. Qu, *J. Alloys Compd.*, 2019, **772**, 808–813.
4. B. Long, M. S. Balogun, L. Luo, Y. Luo, W. Qiu, S. Song, L. Zhang and Y. Tong, *Small*, 2017, **13**, 1702081.
5. X. Peng, W. Li, L. Wang, L. Hu, W. Jin, A. Gao, X. Zhang, K. Huo and P. K. Chu, *Electrochim. Acta*, 2016, **214**, 201–207.
6. T. Peng, Y. Guo, Y. Zhang, Y. Wang, D. Zhang, Y. Yang, Y. Lu, X. Liu, P. K. Chu and Y. Luo, *Appl. Surf. Sci.*, 2021, **536**, 147982.
